# Supplementary material for: Revision history aware repositories of computational models of biological systems
Source: Springer Nature journal article supplement (doi:10.1186/1471-2105-12-22), 2011-01-14
Supplement: 12859_2010_4339_MOESM1_ESM.pdf [file 12859_2010_4339_MOESM1_ESM.pdf]

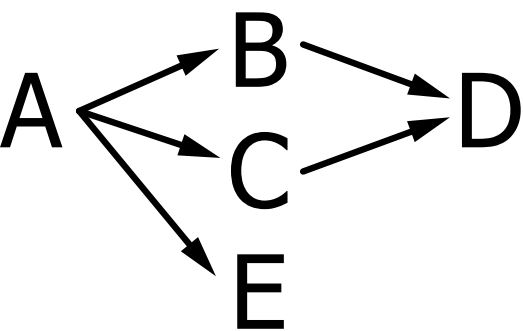

Key:

$X \longrightarrow Y$

Group Y's model  
is derived from  
group X's model
